# Supplementary material
Source: PubMed Central journal article supplement (PMC2635786)
Supplement: 0812596106_0812596106SI.pdf [file 0812596106_0812596106SI.pdf]

# Supporting Information

Eser et al. 10.1073/pnas.0812596106

## SI Text: Plasmid and Strain Constructions

Oligonucleotides used in constructing strains and plasmids are listed in Table S2. Chromosomal alleles were moved by P1 transductions. Chromosomal deletions by inserting antibiotic resistance markers were done in BW25113 by the method of Datsenko and Wanner, and subsequently moved into various other strains by P1 transduction and selected for antibiotic resistance (1). Elimination of the antibiotic resistance markers created by the method of Datsenko and Wanner was performed as described and carried out after introducing the deletion allele with the antibiotic resistance marker into any strain (1). The gene for DsbA was deleted as published (2). *dsbB::K<sub>m</sub><sup>R</sup>* in HK329 was created as in (3) and *dsbB::Cm<sup>R</sup>* in MER144 using oligonucleotides dsbBH43 and dsbBcatP2 and template pKD3. *dsbC::K<sub>m</sub><sup>R</sup>* was created using primers dsbCH1 and dsbCH2 and template pKD4. For *dsbD::K<sub>m</sub><sup>R</sup>*, the primers dsbDH1 and dsbDH2 and template pKD13 were used. The *gshA::Kan<sup>R</sup>* and *gshA::Cm<sup>R</sup>* alleles were derived from MJF152 and MJF141, respectively. Primers cydDH1 and cydDH2 using pKD13 were used to create a *cydD::K<sub>m</sub><sup>R</sup>* allele. *mdlA::K<sub>m</sub><sup>R</sup>* was made using primers mdlA5'P4 and mdlA3'P1 and template pKD13. The *ggt::Kan<sup>R</sup>* allele was constructed using primers ggt-kan-P2 and ggt-del-P1. Strains were made *pho<sup>R</sup>* by P1 transduction using a lysate derived from DHB73, selecting for *K<sub>m</sub><sup>R</sup>* and screening for blue colonies on media plates containing XP (5-bromo-4-chloro-3-indolyl phosphate).

Oligonucleotides ssTorT-for and ssTorT-rev coding for the signal sequence of TorT were annealed and ligated into the *NcoI* site of pDSW204, resulting in pMER81. Plasmid pMER79 was created by cloning the *XbaI* and *HindIII*-flanked 3xFLAG sequence derived from pNB100 (4) into the *XbaI* and *HindIII* sites of pMER81. The genes for TrxA, TrxC, GrxA, and GrxC were amplified from MG1655 using oligonucleotides (*trxA-BspHI*-for, *trxA-ns-XbaI*-rev, *trxC-NcoI*-for, *trxC-ns-XbaI*-rev, *grxA-BspHI*-for, *grxA-ns-XbaI*-rev, *grxC-NcoI*-for, *grxC-ns-XbaI*-rev) digested with either *BspHI* or *NcoI* and *XbaI* and cloned into the *NcoI* and *XbaI* sites of pMER79 to create pMER90, pMER91, pMER92, and pMER94, respectively.

pMER96 was generated by amplifying the bacteriophage T4 glutaredoxin 1 gene *nrdC* from pGRX1 using the oligonucleotides AfIII-NrdC-for and nrdC-ns-*XbaI*-rev and cloning the resulting DNA fragment into the *NcoI* and *XbaI* sites of pMER79. The glutaredoxin 3 gene (*grxC*) was amplified by PCR from purified *E. coli* chromosomal DNA with primers Sal-grxC-F and R-grxC-Hind. The PCR product was digested with *SalI* and *HindIII*, ligated into *SalI*- and *HindIII*-digested pTrc99a-ssTorA-TrxA resulting in pTrc99a-ssTorA-GrxC. GrxC active site mutants were constructed as follows: *grxC* was amplified from plasmid pTrc99a-ssTorA-grxC with forward primers Sal-grxC[AA] for GrxC[AA], Sal-grxC[CA] for GrxC[CA], Sal-grxC[AC] for GrxC[AC] and with R-grxC-Hind as the reverse primer for all three constructs. Each PCR product was digested with *SalI* and *HindIII*, then ligated into *SalI*- and *HindIII*-digested pTrc99a-ssTorA-TrxA, resulting in pTrc99a-ssTorA-GrxC[AA], pTrc99a-ssTorA-GrxC[CA], and pTrc99a-ssTorA-GrxC[AC]. TrxA active site mutants were constructed according to the Quickchange method (Stratagene) using pTrc99a-ssTorA-TrxA as template and the oligonucleotides *trxA-AA-top* and *trxA-AA-bott* to create pMER163, *trxA-CA-top* and *trxA-CA-bott*, creating pMER164, *trxA-AC-top* and *trxA-AC-bott*, resulting in pMER165. The C65Y mutation in GrxC[CA] was introduced by site-directed mutagenesis according to the Quickchange protocol (Stratagene) using primers GrxC-C66Y-for and GrxC-C66Y-rev amplifying plasmid pTrc99a-ssTorA-GrxC[CA] and the resulting isolated plasmid was verified by sequencing. The plasmid pMER187 was created by subcloning the *grxC[CA]C65Y* gene from the site-directed mutagenesis using *XbaI* and *HindIII* restriction sites into *XbaI/HindIII*-digested pTrc99a-ssTorA-GrxC. The genes for the DsbA substrates LivK (leucine-specific-binding protein), YodA (calcium-induced cadmium-binding protein), and RcsF (sensory component of the Rcs phosphorelay system) were subcloned from plasmids pHK641, pHK642, and pHK646 by excising a DNA fragment containing the genes and a 3' *c-Myc* sequence using *KpnI* and *XbaI* and cloning these into the *KpnI/XbaI* sites of pBAD42, resulting in the plasmids pMER154, pMER155, and pMER156, respectively.

1. Datsenko KA, Wanner BL (2000) One-step inactivation of chromosomal genes in *Escherichia coli* K-12 using PCR products. *Proc Natl Acad Sci USA* 97:6640–6645.

2. Kadokura H, Tian H, Zander T, Bardwell JC, Beckwith J (2004) Snapshots of DsbA in action: detection of proteins in the process of oxidative folding. *Science* 303:534–537.

3. Kadokura H, Bader M, Tian H, Bardwell JC, Beckwith J (2000) Roles of a conserved arginine residue of DsbB in linking protein disulfide-bond-formation pathway to the respiratory chain of *Escherichia coli*. *Proc Natl Acad Sci USA* 97:10884–10889.

4. Buddelmeijer N, Beckwith J (2004) A complex of the *Escherichia coli* cell division proteins FtsL, FtsB and FtsQ forms independently of its localization to the septal region. *Mol Microbiol* 52:1315–1327.

Table S1. *E. coli* strains and plasmids

| Strain or plasmid       | Genotype or description                                                                                                                                                                                                                                                          | Ref. or source        |
|-------------------------|----------------------------------------------------------------------------------------------------------------------------------------------------------------------------------------------------------------------------------------------------------------------------------|-----------------------|
| Strains                 |                                                                                                                                                                                                                                                                                  |                       |
| MC1000                  | <i>araD139 Δ(araABC-leu)7697 galU galK Δ(lac)X74 rpsL thi</i>                                                                                                                                                                                                                    | 1                     |
| MG1655                  | <i>E. coli</i> K12                                                                                                                                                                                                                                                               | 2                     |
| DHB3                    | <i>Δ(ara-leu)7697 araD139 ΔlacX74 galE galK rpsL phoR Δ(phoA)PvuII ΔmalF3 thi</i>                                                                                                                                                                                                | 3                     |
| DHB73                   | DHB3 <i>phoA<sup>+</sup> phoR<sup>-</sup> proC::Tn10</i>                                                                                                                                                                                                                         | Dana H. Boyd          |
| DH5 $\alpha$            | F <sup>-</sup> $\Phi$ 80 <i>lacZ</i> $\Delta$ M15 $\Delta$ ( <i>lacZYA-argF</i> )U139 <i>recA1 endA1 hsdR17</i> ( <i>r<sub>K</sub><sup>-</sup> m<sub>K</sub><sup>-</sup></i> ) <i>gal<sup>-</sup> phoA supE11 <math>\lambda</math><sup>-</sup> thi<sup>-</sup>1 gyrA96 relA1</i> | Invitrogen            |
| BW25113                 | <i>lacI<sup>q</sup> rrmB<sub>T17</sub> ΔlacZ<sub>WJ16</sub> hsdR514 ΔaraBAD<sub>AH33</sub> ΔrhaBAD<sub>LD78</sub></i>                                                                                                                                                            | 4                     |
| MJF141                  | DHB4 <i>gshA::Cm<sup>R</sup></i>                                                                                                                                                                                                                                                 | Melinda Faulkner      |
| MJF152                  | DHB4 <i>gshA::Km<sup>R</sup></i>                                                                                                                                                                                                                                                 | 5                     |
| HK295                   | MC1000 <i>Δara714 leu<sup>+</sup></i>                                                                                                                                                                                                                                            | 6                     |
| HK317                   | HK295 <i>ΔdsbA</i>                                                                                                                                                                                                                                                               | 7                     |
| HK329                   | HK295 <i>ΔdsbA ΔdsbB</i>                                                                                                                                                                                                                                                         | This study            |
| HK581                   | HK317 <i>ΔgshA</i>                                                                                                                                                                                                                                                               | This study            |
| HK582                   | HK329 <i>ΔgshA</i>                                                                                                                                                                                                                                                               | This study            |
| HK453                   | HK295 <i>ΔdsbA ΔdsbC ΔdsbD</i>                                                                                                                                                                                                                                                   | This study            |
| MER144                  | HK453 <i>ΔdsbB</i>                                                                                                                                                                                                                                                               | This study            |
| MER380                  | HK453 <i>ΔgshA</i>                                                                                                                                                                                                                                                               | This study            |
| MER360                  | HK295 <i>phoR<sup>-</sup>..proC::Tn10</i>                                                                                                                                                                                                                                        | This study            |
| MER390                  | HK317 <i>phoR<sup>-</sup>..proC::Tn10</i>                                                                                                                                                                                                                                        | This study            |
| MER392                  | HK329 <i>phoR<sup>-</sup>..proC::Tn10</i>                                                                                                                                                                                                                                        | This study            |
| MER382                  | MER360 <i>ΔgshA</i>                                                                                                                                                                                                                                                              | This study            |
| MER394                  | HK581 <i>phoR<sup>-</sup>..proC::Tn10</i>                                                                                                                                                                                                                                        | This study            |
| MER396                  | HK582 <i>phoR<sup>-</sup>..proC::Tn10</i>                                                                                                                                                                                                                                        | This study            |
| MER554                  | MER360 <i>ΔmdlA</i>                                                                                                                                                                                                                                                              | This study            |
| MER556                  | MER390 <i>ΔmdlA</i>                                                                                                                                                                                                                                                              | This study            |
| MER471                  | MER360 <i>Δggt</i>                                                                                                                                                                                                                                                               | This study            |
| MER496                  | MER392 <i>Δggt</i>                                                                                                                                                                                                                                                               | This study            |
| HK408                   | HK295 <i>ΔcydD</i>                                                                                                                                                                                                                                                               | This study            |
| HK498                   | HK317 <i>ΔcydD</i>                                                                                                                                                                                                                                                               | This study            |
| MER487                  | HK408 <i>phoR<sup>-</sup>..proC::Tn10</i>                                                                                                                                                                                                                                        | This study            |
| MER491                  | HK498 <i>phoR<sup>-</sup>..proC::Tn10</i>                                                                                                                                                                                                                                        | This study            |
| Plasmids                |                                                                                                                                                                                                                                                                                  |                       |
| pCP20                   | pINT-ts <i>araC P<sub>araB</sub><sup>-</sup><math>\gamma</math>-<math>\beta</math>-exo</i>                                                                                                                                                                                       | 4                     |
| pKD46                   | pINT-ts <i>araC P<sub>araB</sub><sup>-</sup><math>\gamma</math>-<math>\beta</math>-exo-tL3</i>                                                                                                                                                                                   | 4                     |
| pKD3                    | pANTS- $\gamma$ FRT flanked <i>cat<sup>R</sup></i>                                                                                                                                                                                                                               | 4                     |
| pKD4                    | pANTS- $\gamma$ FRT flanked <i>kan<sup>R</sup></i>                                                                                                                                                                                                                               | 4                     |
| pTrc99a                 | <i>ori<sub>pBR322</sub> P<sub>trc</sub> T<sub>rrnB</sub> bla</i>                                                                                                                                                                                                                 | Promega               |
| pDSW204                 | pTrc99a with attenuated promoter                                                                                                                                                                                                                                                 | 8                     |
| pAM239                  | <i>ori<sub>pSC101</sub> P<sub>lac</sub> spec<sup>R</sup></i>                                                                                                                                                                                                                     | laboratory collection |
| pBAD42                  | <i>ori<sub>pSC101</sub> araC P<sub>araB</sub> spec<sup>R</sup></i>                                                                                                                                                                                                               | L.M. Guzman           |
| pNB100                  | pBAD18 <i>FLAG<sub>3</sub></i>                                                                                                                                                                                                                                                   | 9                     |
| pGRX1                   | pQE60- <i>nrdC</i>                                                                                                                                                                                                                                                               | 10                    |
| pHK641                  | pAM238 <i>livK-c-Myc</i>                                                                                                                                                                                                                                                         | 7                     |
| pHK642                  | pAM238 <i>yodA-c-Myc</i>                                                                                                                                                                                                                                                         | 7                     |
| pHK646                  | pAM238 <i>rcsF-c-Myc</i>                                                                                                                                                                                                                                                         | 7                     |
| pMER79                  | pDSW204-TorTss-FLAG                                                                                                                                                                                                                                                              | This study            |
| pMER81                  | pDSW204-TorTss                                                                                                                                                                                                                                                                   | This study            |
| pMER90                  | pDSW204-TorTss- <i>trxA</i> -FLAG                                                                                                                                                                                                                                                | This study            |
| pMER91                  | pDSW204-TorTss- <i>trxC</i> -FLAG                                                                                                                                                                                                                                                | This study            |
| pMER92                  | pDSW204-TorTss- <i>grxA</i> -FLAG                                                                                                                                                                                                                                                | This study            |
| pMER94                  | pDSW204-TorTss- <i>grxC</i> -FLAG                                                                                                                                                                                                                                                | This study            |
| pMER96                  | pDSW204-TorTss- <i>nrdC</i> -FLAG                                                                                                                                                                                                                                                | This study            |
| pTrc99a-ssTorA-TrxA     | pTrc99a TorAss- <i>trxA</i>                                                                                                                                                                                                                                                      | 11                    |
| pMER163                 | pTrc99a TorAss- <i>trxA</i> (C32A, C35A mutations in <i>trxA</i> )                                                                                                                                                                                                               | This study            |
| pMER164                 | pTrc99a TorAss- <i>trxA</i> (C35A mutation in <i>trxA</i> )                                                                                                                                                                                                                      | This study            |
| pMER165                 | pTrc99a TorAss- <i>trxA</i> (C32A mutation in <i>trxA</i> )                                                                                                                                                                                                                      | This study            |
| pTrc99a-ssTorA-GrxC     | pTrc99a TorAss- <i>grxC</i>                                                                                                                                                                                                                                                      | This study            |
| pTrc99a-ssTorA-GrxC[AA] | pTrc99a TorAss- <i>grxC</i> (C11A C14A mutations in <i>grxC</i> )                                                                                                                                                                                                                | This study            |
| pTrc99a-ssTorA-GrxC[CA] | pTrc99a TorAss- <i>grxC</i> (C14A mutation in <i>grxC</i> )                                                                                                                                                                                                                      | This study            |



**Table S2. Oligonucleotides**

| Name             | Sequence (5'→3')                                                           |
|------------------|----------------------------------------------------------------------------|
| dsbBH43          | aaatatagcggcaggaaaaaagcgctccgcaggagcgccgaatggattagtgtaggctggagctgcttc      |
| dsbBcatP2        | aatgaattggtttaactcgcactctatgcatattgcaggaaatgattcatatgaaatcctccta           |
| dsbCH1           | atcaacagcatcaccgcggcgctgtagtctgaaaagaacgggaagatttgtaggctggagctgctcg        |
| dsbCH2           | acggcgacgaaggtgatctgtgtttcacgcgaattattaccgctggtcatatgaaatcctccttag         |
| dsbDH1           | ccggaactctggttttacctgttacacacggagacacagattacctctattccggggatccgctgacc       |
| dsbDH2           | tcttcaggttgcaagctatttctccgctcttccactgcaagtgtcgtgtgtaggctggagctgcttc        |
| cydDH1           | tgtaacattgctctgcaaaataattctgataactcacctgctaagcgtgcaattccggggatccgctgacc    |
| cydDH2           | atccattatgacgtttatacagtgccagatagggtagcaaagcgcgatgtaggctggagctgcttc         |
| mdlA5'P4         | tctttaccatcgaataaataatccagaatcaggtcaggacacaacgcgtagtccggggatccgctgacc      |
| mdlA3'P1         | gcttgagagtcggccacagttggctaaaactacgcatcgacggcctcctgtgtaggctggagctgctcg      |
| ggg-kan-P2       | ccgacgtttttacgccgggtggccattgctgctgctctcaggaagttgcatatgaaatcctccttag        |
| ggg-del-P1       | cgccgttaaatcatccaccgagcgggctggatgctgctgctcacaactcacgtaggctggagctgcttc      |
| ssTorT-for       | tcatgctgctactgctatttttacttcttccctttcatggtgcccgcattttccatg                  |
| ssTorT-rev       | catggaaaatgcccgaacatgaaaagggaaaagaagtaaaaatagcagtacgcg                     |
| trxA-BspHI-for   | actatcatgagcgataaaattattcacctgac                                           |
| trxA-ns-XbaI-rev | gctctagacgccaggttagcgtcgaggaac                                             |
| trxC-NcoI-for    | catgccatgggtaataaccgtttgtaccattgtcagg                                      |
| trxC-ns-XbaI-rev | gctctagaaagagattcgttcagccagc                                               |
| grxA-BspHI-for   | actatcatgatgcaaacggttatttttgctgctcg                                        |
| grxA-ns-XbaI-rev | gctctagaggcgtccagattttcttcac                                               |
| grxC-NcoI-for    | catgccatggcgaattgtgaaatctatacacaagaagaac                                   |
| grxC-ns-XbaI-rev | gctctagatttcagcaggggatccagctcc                                             |
| AflIII-NrdC-for  | ttacatgtttaagtatatggttatgatagc                                             |
| nrdC-ns-XbaI-rev | gctctagatttaaagtattcccgaattg                                               |
| Sal-grxC-F       | ctctcgtcgacatggccaatggtgaaatctatacca                                       |
| R-grxC-Hind      | ctctcaagcttatttcagcaggggatccagt                                            |
| Sal-grxC[AA]     | ctctcgtcgacatggccaatggtgaaatctatacacaagaacccgcccgtatgctgcatgcaaaagcactgctg |
| Sal-grxC[CA]     | ctctcgtcgacatggccaatggtgaaatctatacacaagaacccgcccgtatgctgcatgcaaaagcactgctg |
| Sal-grxC[AC]     | ctctcgtcgacatggccaatggtgaaatctatacacaagaacccgcccgtatgctgcatgcaaaagcactgctg |
| R-grxC-Hind      | ctctcaagcttatttcagcaggggatccagt                                            |
| GrxC-C66Y-for    | cacagcattggcggctacgatgactgtatgcatg                                         |
| GrxC-C66Y-rev    | caatgcatacaagctatcgtagccgccaatgctgctg                                      |
| trxA-AA-top      | cgatttctgggcagagtgggccggtccggccaaaatgatgccccgattc                          |
| trxA-AA-bott     | gaatcggggcgatcattttgcccggaccgcccactctgccagaatcg                            |
| trxA-CA-top      | cgatttctgggcagagtggtgctgcccggccaaaatgatgccccgattc                          |
| trxA-CA-bott     | gaatcggggcgatcattttgcccggaccgcccactctgccagaatcg                            |
| trxA-AC-top      | cgatttctgggcagagtgggccggtccgtgcaaaatgatgccccgattc                          |
| trxA-AC-bott     | gaatcggggcgatcattttgcagcggaccgcccactctgccagaatcg                           |
